# Supplementary material for: Development of dansyl based copper(ii) complex to detect hydrogen sulfide in hypoxia
Source: Royal Society of Chemistry journal article supplement (doi:10.1039/c9ob00948e), 2019-01-01
Supplement: c9ob00948e1.pdf [file c9ob00948e1.pdf]

## **Supplementary Information**

### **Development of dansyl based copper (II) complex to detect hydrogen sulfide in hypoxia**

Jee Young Kim,<sup>‡a</sup> Swarbhanu Sarkar,<sup>‡a</sup> Kondapa Naidu Bobba,<sup>‡a</sup> Phuong Tu Huynh,<sup>a</sup>  
Abhinav Bhise,<sup>a</sup> Jeongsoo Yoo<sup>\*a</sup>

<sup>a</sup> Department of Molecular Medicine, BK21 Plus KNU Biomedical Convergence Program,  
Kyungpook National University, Daegu 700-842, South Korea.

Fax: (+82) 53-426-4944; E-mail: [yooj@knu.ac.kr](mailto:yooj@knu.ac.kr)

<sup>‡</sup>These authors contributed equally to this work.

# Table of contents

|                                                              |     |
|--------------------------------------------------------------|-----|
| Mechanism of Hydrogen sulphide in hypoxia                    | S1  |
| $^1\text{H}$ NMR spectrum of <b>CD</b> in DMSO- $\text{d}_6$ | S2  |
| $^{13}\text{C}$ NMR spectrum of <b>CD</b> in $\text{CDCl}_3$ | S3  |
| HRMS spectrum of <b>CD</b>                                   | S4  |
| HRMS spectrum of <b>Cu-CD</b>                                | S5  |
| UV absorption spectrum of compound <b>CD</b>                 | S6  |
| Limit of detection                                           | S7  |
| Analytes study                                               | S8  |
| Cell Imaging                                                 | S9  |
| Western blot analysis                                        | S10 |

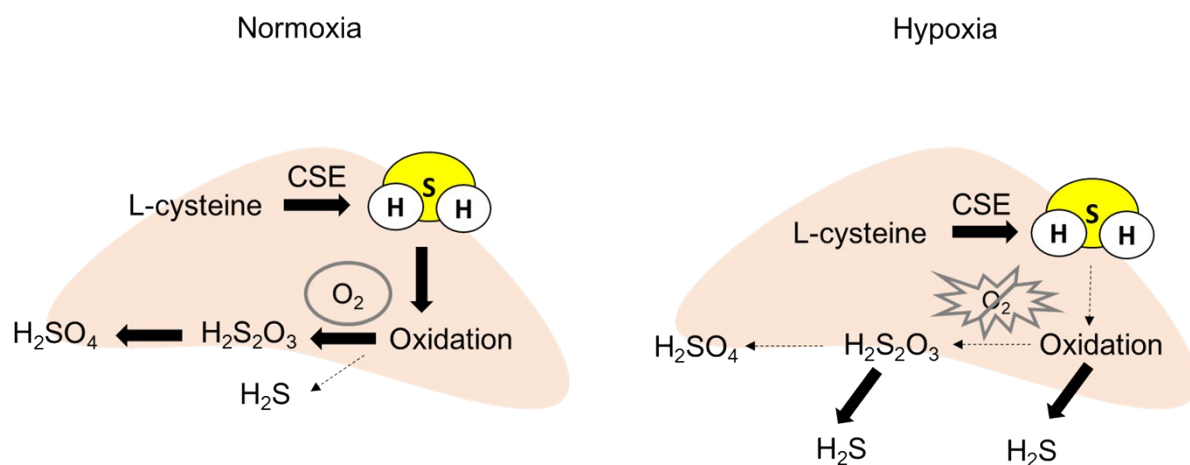

**Fig. S1** Biological pathway for hydrogen production under hypoxia and normoxia

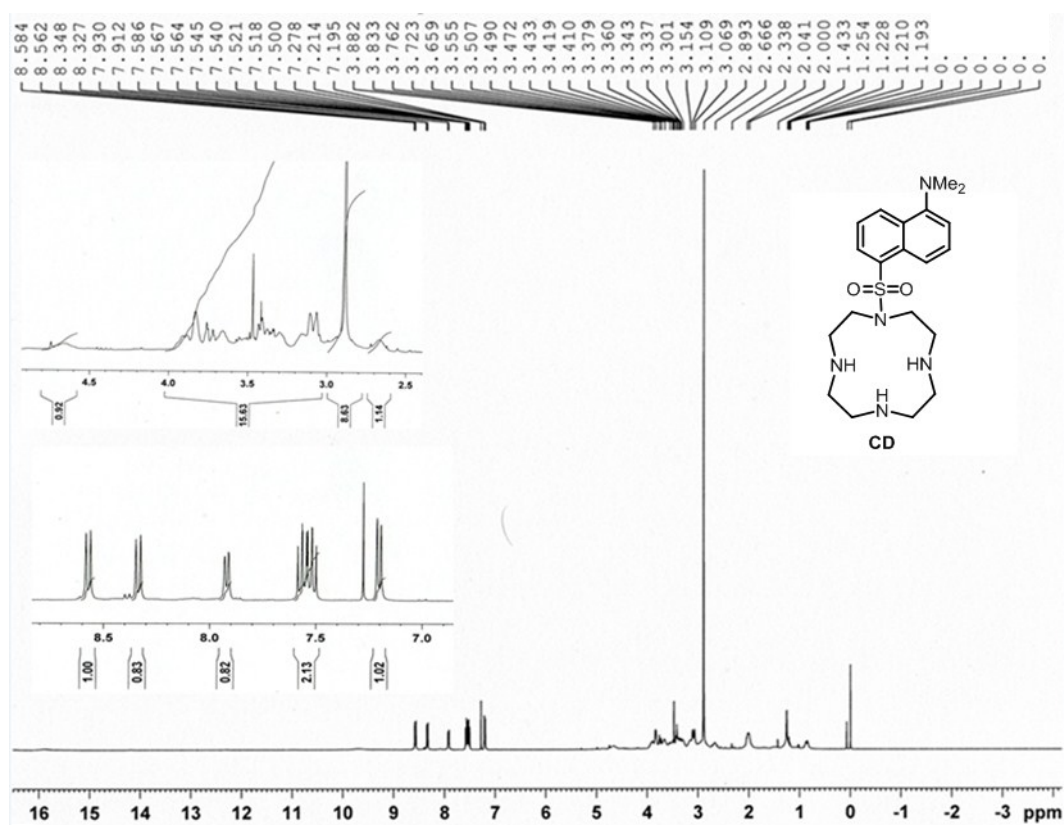

**Fig. S2**  $^1H$  NMR spectrum of **CD** in  $CDCl_3$

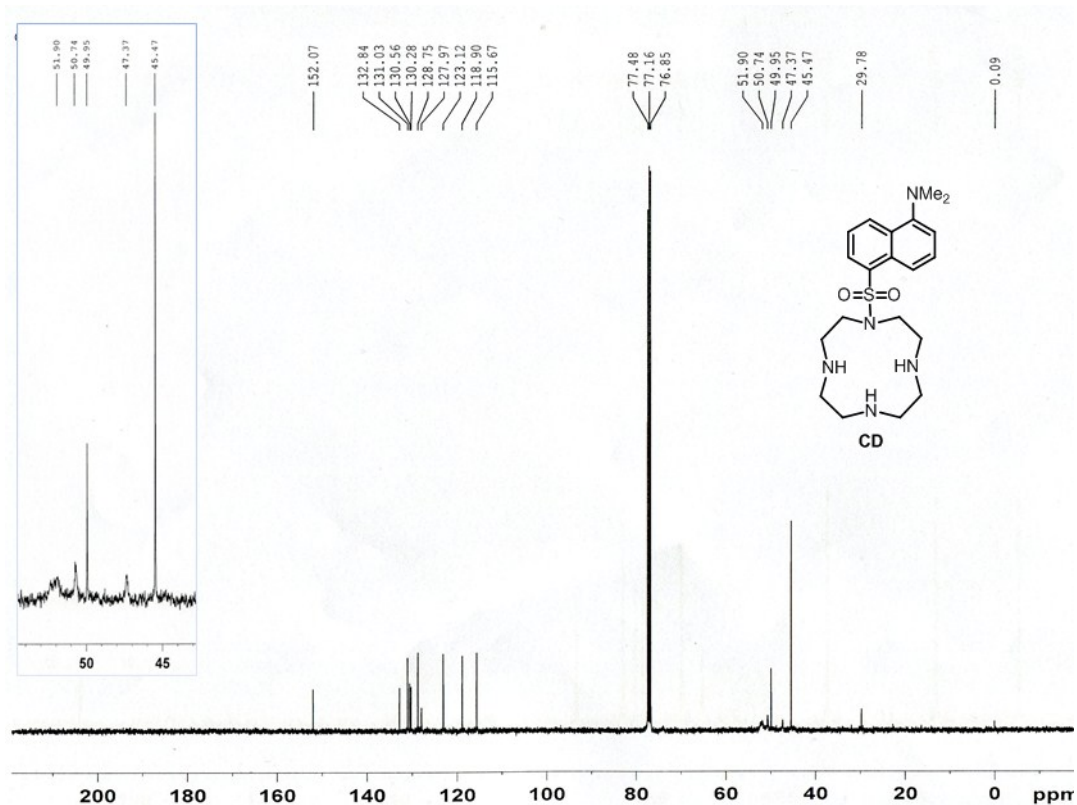

**Fig. S3** <sup>13</sup>C NMR spectrum of CD in CDCl<sub>3</sub>.

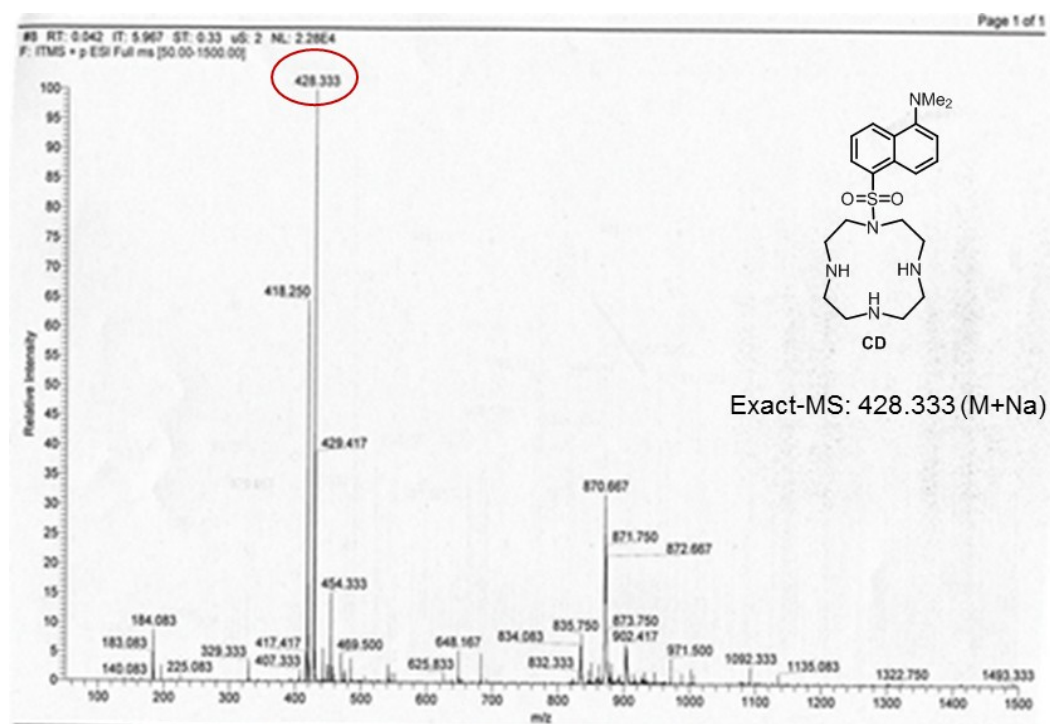

**Fig. S4** HRMS spectrum of CD

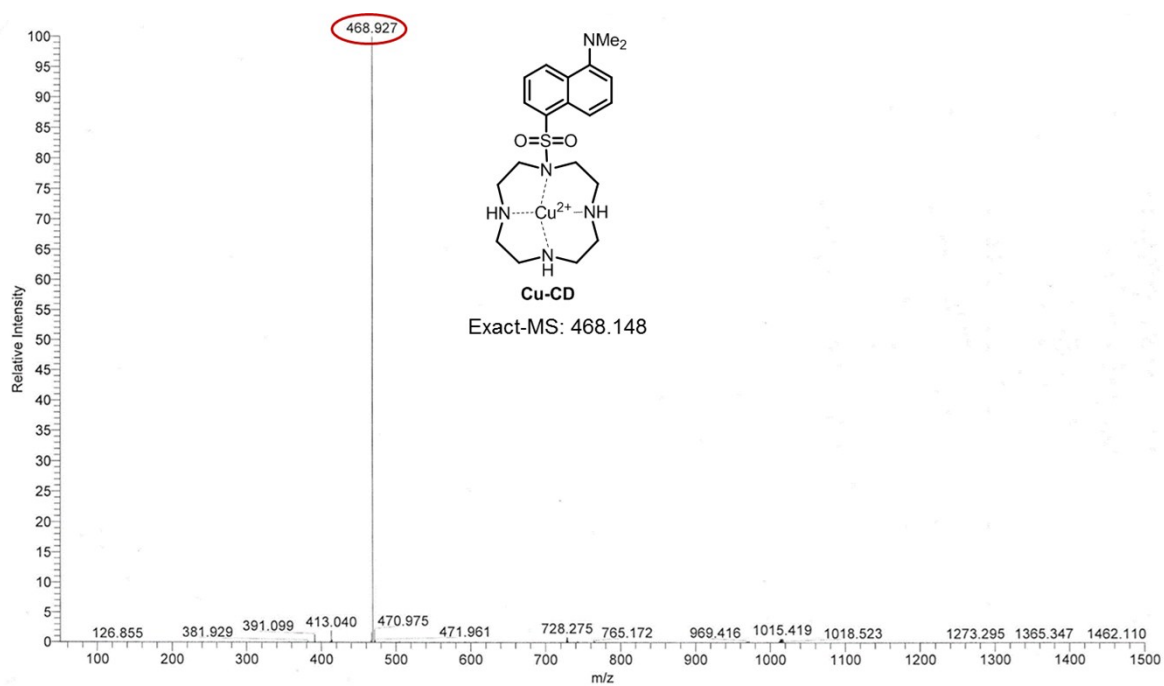

**Fig. S5** HRMS spectrum of Cu-CD

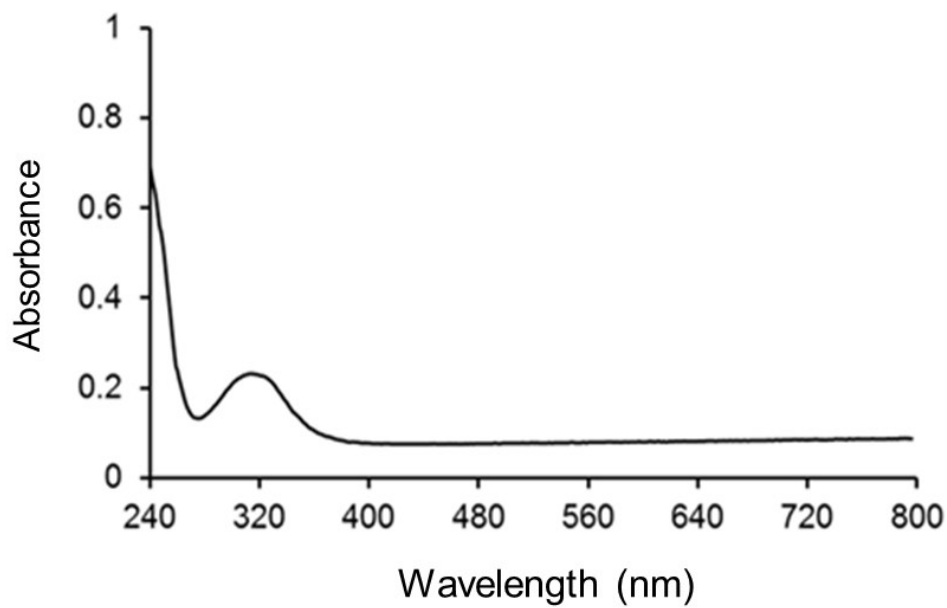

**Fig. S6** UV absorption spectrum of compound CD (25  $\mu$ M) in PBS buffer (10% DMSO).

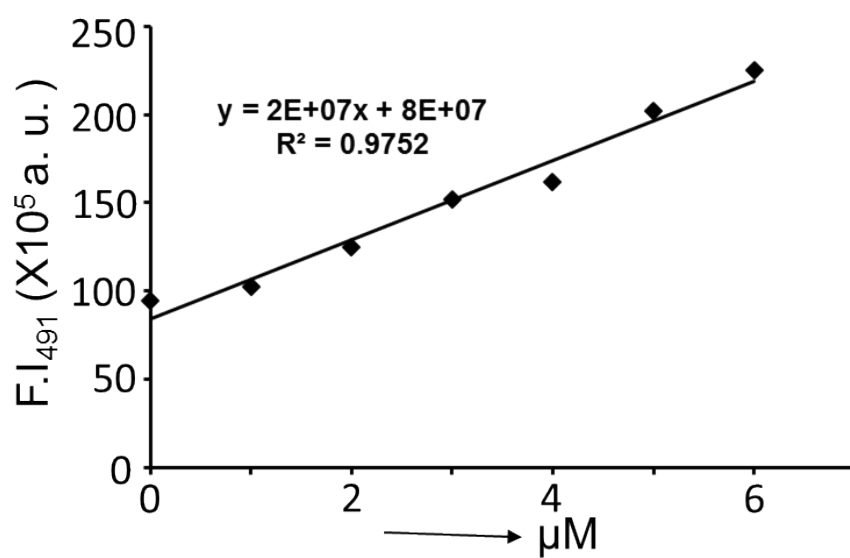

**Fig. S7** Fluorescence Emission changes of **Cu-CD** (25 μM) in the presence of H<sub>2</sub>S (0-6 μM)

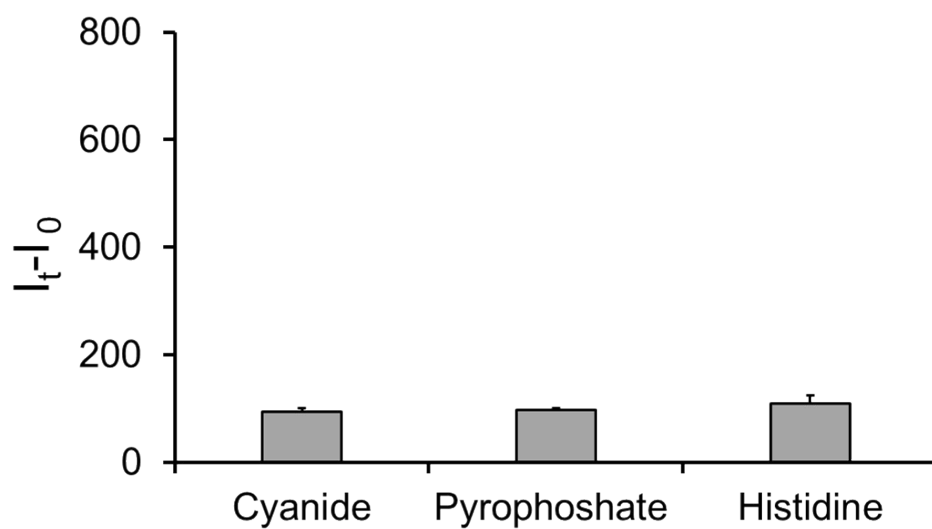

**Fig. S8** Fluorescence intensity changes of **Cu-CD** (25 μM) upon addition of Cyanide, Histidine and Pyrophosphate (each analyte~200 μM) at 37 °C in PBS buffer for 45 min.

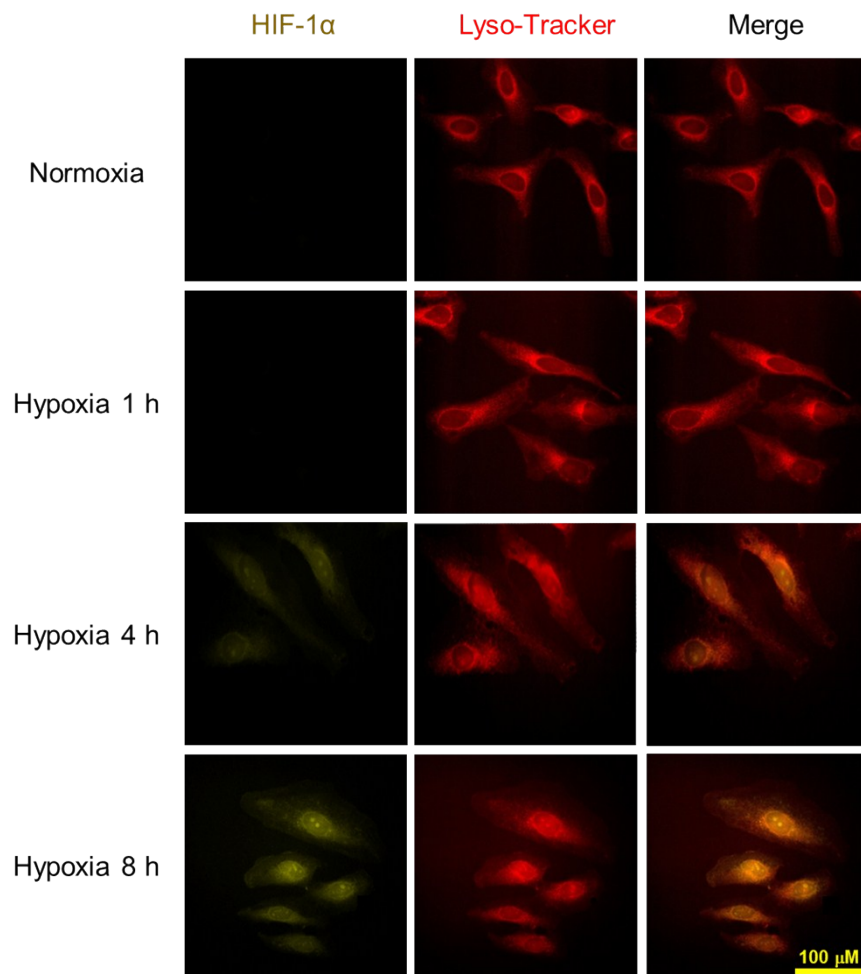

**Fig. S9** Immunofluorescence imaging of HIF-1 $\alpha$  expression under normoxia or hypoxia (1 h, 4 h, and 8 h) using HeLa cells. For acquiring immune-fluorescence images in normoxia or hypoxia condition, HeLa cells were incubated for 8 h in normal condition or introduced into the hypoxia incubator chamber for 1, 4 or 8 h. The fluorescence signals of the fluorescent probe and HIF-1 $\alpha$  were merge with Lyso-Tracker deep red. Scale bars = 100  $\mu$ m.

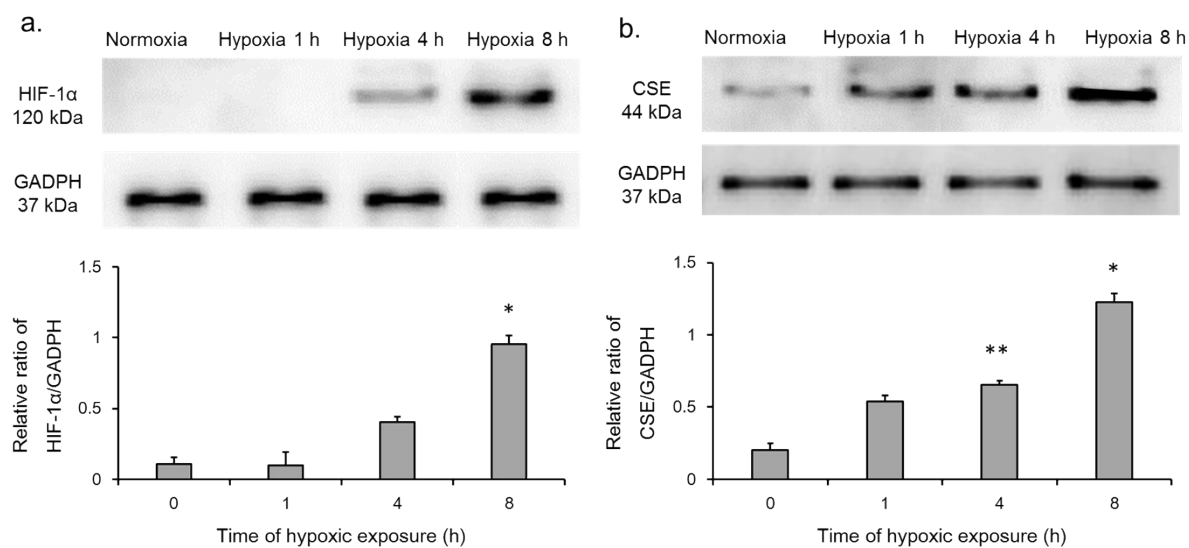

**Fig. S10** Western blotting analysis of HIF-1 $\alpha$  (a) CSE protein expression (b) under normoxia and hypoxia (1 h, 4 h, and 8 h) using HeLa cells and relative intensity normalized to the expression of GAPDH and relative ratio of the proteins was quantified using ImageJ software.  $P < .05$ ; \*\* $P < .001$

**Table 1:** Fluorescence quantum yield of **Cu-CD** and **Cu-CD** in the presence of H<sub>2</sub>S

| $\Phi_{fl}$                   |      |
|-------------------------------|------|
| <b>Cu-CD</b>                  | 0.04 |
| <b>Cu-CD + H<sub>2</sub>S</b> | 0.52 |
